# Supplementary material
Source: publisher figshare collection journal article supplement (https://diabetesjournals.figshare.com/articles/dataset/_/25259953)
Supplement: Supplementary file 1 [file 44625049]

## **Supplementary Material**

### **Supplemental Methods:**

#### ***Histological analysis***

Liver samples were fixed in 4% paraformaldehyde overnight or immediately embedded in Tissue-Tek OCT compound. Formalin-fixed piece was embedded by paraffin and sectioned at 5  $\mu\text{m}$  for hematoxylin and eosin (H&E) staining, Picrosirius red staining and immunohistochemistry (F4/80). Oil Red O staining and DHE staining were performed with the OCT-embedded and frozen tissue sections. Quantification analysis was performed by Image J software.

#### ***Measurements of plasma and liver parameters***

The blood samples were collected in a tube containing 3.2% buffered sodium citrate and then centrifugated at 1,500 $\times$ g for 20 min to obtain plasma. Plasma FVII levels were quantified by a FVII ELISA kit (Cloud-Clone Corp, China) according to the manufacturer's instructions. Plasma alanine aminotransferase (ALT) and aspartate aminotransferase (AST) were measured by commercial kits (ShenSuo UNF, Shanghai, China) following the manufacturer's instructions. TG and TC levels from the liver were measured by commercial kits (Cat# E1013 for TG, Cat# E1015 for TC; Applygen, Beijing, China), and liver NEFA were measured by another kit (Cat# A042-2-1; Jiancheng, Jiangsu, China).

### ***Plasmids construction***

ShRNA targeting F7 mRNA was designed by the BLOCK-iT RNAi Designer (ThermoFisher, Waltham, MA, USA). Oligonucleotides were annealed and then cloned into the BLOCK-iT™ U6 RNAi Entry Vector (ThermoFisher, Waltham, MA, USA; cat#K494500), followed by homologous recombination into the pAd/BLOCK-iT™-DEST RNAi Gateway® adenovirus Vector (ThermoFisher, Waltham, MA, USA; cat#V49220). The U6 promoter was used in this construct. As a control, we utilized shRNA targeting LacZ (CTACACAAATCAGCGATTT). F7-flag expression plasmids were generated by standard PCR based procedures and cloned into the pLVX expression lentivirus vector (Clontech, Mountain View, CA, USA) or pENTR™ Directional TOPO® Cloning vector (ThermoFisher, Waltham, MA, USA; cat#240020). The later vector was then recombined into the pAd/CMV/V5-DEST™ Gateway™ Adenoviral Expression vector (ThermoFisher, Waltham, MA, USA; cat#V4932). T7 promoter was utilized in adenoviral system to enhance F7 expression. As a control, an adenoviral vector expressing LacZ (Ad-ctrl) was prepared. The F7 mutant plasmid with signal peptide deletion ( $\Delta$ AA 2-24) was subcloned from pLVX-F7-flag by the NEBuilder HiFi DNA assembly kit (NEB, Ipswich, MA, USA). The primers were listed in Table S1.

### ***Adenovirus production***

The recombinant adenovirus plasmids were linearized with PacI restriction enzyme and

transfected into HEK293A cells (ThermoFisher, Waltham, MA, USA) to generate adenovirus. The adenovirus was purified by cesium chloride ultracentrifugation. The viral titers were quantified by cytopathic effect assay.

### ***Coagulation homeostasis analysis***

The mice were anesthetized with isoflurane, and their tails were cut by 5 mm. The tails were then placed into a beaker containing 37°C physiological saline solution and the bleeding time was recorded when the bleeding from the tails stopped. For the clotting time test, blood samples were collected from the retro-orbital sinus vein into a capillary blood collection tube without anti-coagulant. At 30-second intervals, the tubes were tilted to observe the blood's flow ability. The clotting time was recorded when the blood clotting occurred. For coagulation four indices, blood samples were collected in a tube containing 3.2% buffered sodium citrate and then centrifugated at 3,500×g for 10 min to obtain plasma. The plasma was then put into Sysmex CS-2400 automated coagulation analyzer (Sysmex, Kobe, Japan) to measure coagulation four indices: prothrombin time (PT), activated partial thromboplastin time (APTT), thrombin time (TT) and plasma fibrinogen (FIB) levels.

### ***FeCl<sub>3</sub> induced thrombosis model***

The mice were anesthetized with pentobarbitalum natricum, and then the right common carotid arteries were carefully exposed and separated from surrounded tissue. To record blood flow, a doppler flow probe (Transonic Systems, New York, USA) was placed on

the carotid artery. When a 2-mm piece of filter paper saturated with 30% FeCl<sub>3</sub> (Sigma-Aldrich, Burlington, MA, USA) was wrapped on the surface of carotid artery, the blood flow was immediately monitored. 3 minutes later, the filter paper was removed, and the occlusion time was defined when blood flow < 0.05 mL/min.

### ***Cellular lipid assay***

Hepatocytes were treated with 1 mM mixed free fatty acids (FFA) consisting of palmitic acid (PA) and oleic acid (OA) at a ratio of 1:2 for 24 h to induce cellular lipid accumulation. Then cells were fixed with 4% paraformaldehyde and stained with Nile red (Sigma-Aldrich, Burlington, MA, USA) for 15 min or Oil Red O (Sigma-Aldrich, Burlington, MA, USA) for 1 h to examine lipid droplets. Intracellular TG contents were assessed as above described.

### ***Tissue and cellular lipotoxicity assay***

Frozen liver sections and primary hepatocytes were washed with PBS twice and then stained with 10 μM DHE (ThermoFisher, Waltham, MA, USA) for 30 min to detect superoxide anion radical. For mitochondrial function analysis, hepatocytes were incubated with 500 nM Mito-Tracker Red (ThermoFisher, Waltham, MA, USA) for 30 min to detect mitochondrial content and 10 mM JC-1 (Yeasen Biotech, Shanghai, China) for 30 min to detect mitochondrial membrane potential. The staining cells were imaged by a fluorescence microscope and analyzed by Image J software.

### ***Immunofluorescence***

Primary hepatocytes were fixed with 4% formalin for 15 min, then permeabilized with 0.2% Triton X-100 and blocked with 5% BSA for 1 h. The paraffin sections were subjected to deparaffinized and antigen repair, and then blocked with 5% BSA (37°C, 1 h). Subsequently, they were incubated with the appropriate primary antibodies overnight and then treated with the corresponding secondary antibodies for 1 h. The nuclei of cells were counterstained using DAPI for 10 min prior to mounting on a slide and imaging via two-photon microscope (Olympus, USA).

### ***Immunoblot***

Liver tissues and hepatocytes were lysed with lysis buffer (50 mM Tris-HCl, 150 mM NaCl, 1% SDS, pH 8.0) containing protease inhibitors and phosphorylation inhibitors (ThermoFisher, Waltham, MA, USA). Then the protein was separated by a 10% SDS-PAGE gel and transferred onto a polyvinylidene difluoride membrane (Millipore, Billerica, MA, USA). Membranes were blocked with 5% BSA and incubated with specific primary antibodies overnight, followed by incubation with the secondary antibodies (1:50,000; Jackson Immuno Research Laboratory, West Grove, PA, USA) for 1 h at room temperature. Immunoreactivities were detected with enhanced chemiluminescent autoradiography (Millipore, Billerica, MA, USA). Antibodies against FVII (Cat# 197656), p-mTOR (Cat# 109268), and mTOR (Cat# ab32028) were purchased from Abcam (Cambridge, UK). Antibodies against p-AKT (Ser 473) (Cat# 9271), AKT (Cat# 4691), p-ERK1/2 (Cat# 4377), ERK (Cat# 4695), p-p38MAPK (Cat#

4511), p38MAPK(Cat# 8690), HNF4 $\alpha$ (Cat# 3113), p-IR (Cat# 3024), total IR(Cat# 3020), IRS1(Cat# 2382), PDK1(Cat# 5662), PTEN(Cat# 9188), PP2A-A (Cat# 2041) and  $\beta$ -Actin (Cat# 4967) were purchased from Cell Signaling Technology (CST, MA, USA). Antibody against CD36 (Cat# NB400-144) was purchased from Novus Biologicals (Littleton, CO, USA). Antibody against PTP1B (Cat# 11334-1-AP) was purchased from Proteintech (Hubei, China). Antibody against IRS2 (Cat# A7945) was purchase from Abclonal (Hubei, China).

### ***Real-time PCR***

Total RNA was isolated from hepatocytes or liver tissues using the TRIzol reagent (ThermoFisher, Waltham, MA, USA) following manufacturer's instruction. RNA was reverse transcribed to cDNA using a First Strand cDNA Synthesis Kit (Vazyme Biotech, Nanjing, China). Real-time quantitative PCR (RT-qPCR) was performed in a LightCycler® 480 Multiwell Plate 384 PCR system (Roche) using SYBR Green Supermix (Vazyme Biotech, Nanjing, China) and normalized to the expression of 18S. The primer sequences used for RT-qPCR was available in Table S1.

# Supplemental Figures

## Figure S1

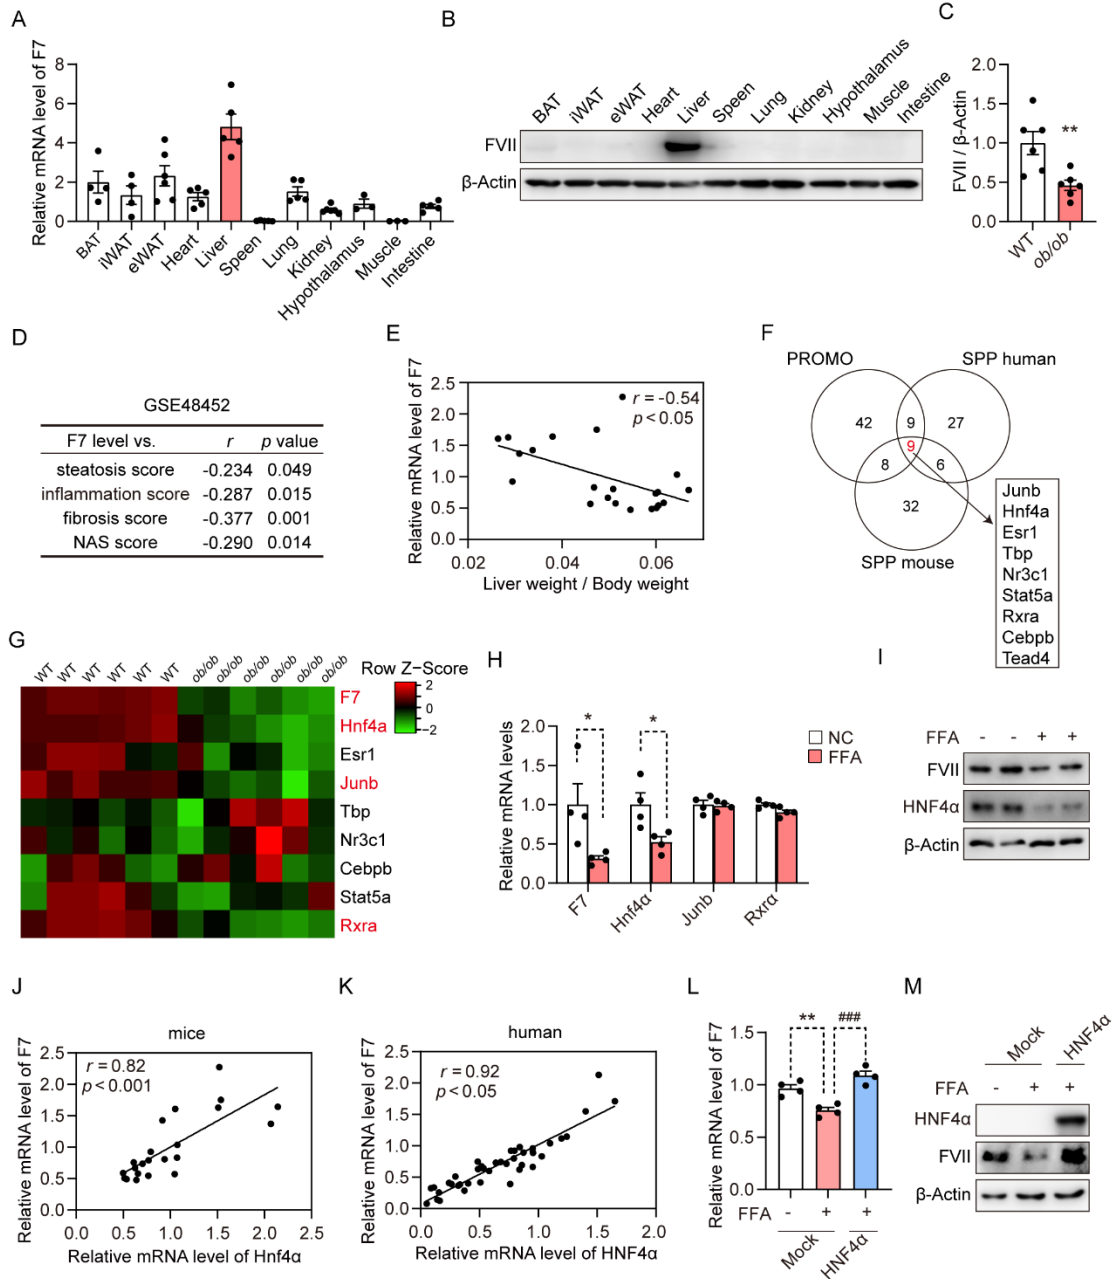

**Figure S1. FVII is downregulated by HNF4α during NAFLD, related to Figure 1**

(A) RT-qPCR analysis of *F7* mRNA level in the indicated tissues from 8-week-old male C57BL/6J mice ( $n = 4-5$ ).

(B) Immunoblot analysis of FVII protein level in the indicated tissues from C57BL/6J mice.  $\beta$ -Actin was used as a loading control.

(C) Quantitative analysis of FVII protein level from panel (G) in Figure 1.

(D) Correlation analysis between hepatic *F7* mRNA level and NAFLD score from GSE48452 ( $n = 71$ ).

(E) Correlation analysis between hepatic *F7* mRNA level and liver to body weight ratio in C57BL/6J mice fed *ad libitum* with HFD for 24 weeks.

(F) Venn diagram of candidate transcription factors of *F7* predicated by PROMO (human *F7*) and SPP (human and murine *F7*).

(G) Heatmap of relative expression of candidate transcription factors in the livers of WT and *ob/ob* mice (GSE49195).

(H, I) RT-qPCR analysis (H) and immunoblots analysis (I) of FVII and HNF4 $\alpha$  in L02 cells treated with FFAs for 24 h.

(J, K) Correlation analysis between hepatic *F7* mRNA level and *Hnf4 $\alpha$*  mRNA level in mice (J,  $n = 22$ ) and human (K,  $n = 45$ ).

(L, M) RT-qPCR analysis (L) and immunoblots analysis (M) of FVII expression in L02 cells transfected with mock or HNF4 $\alpha$  vector in the present or absent of FFAs.

Data are presented as mean  $\pm$  S.E.M. Significance was assessed by Student's *t* test (C, H), Pearson correlation (E, K), Spearman correlation (D, J), or one-way ANOVA (L). \*

$P < 0.05$ , \*\*  $P < 0.01$ , \*\*\* or ####  $P < 0.001$  versus control.



## Figure S2

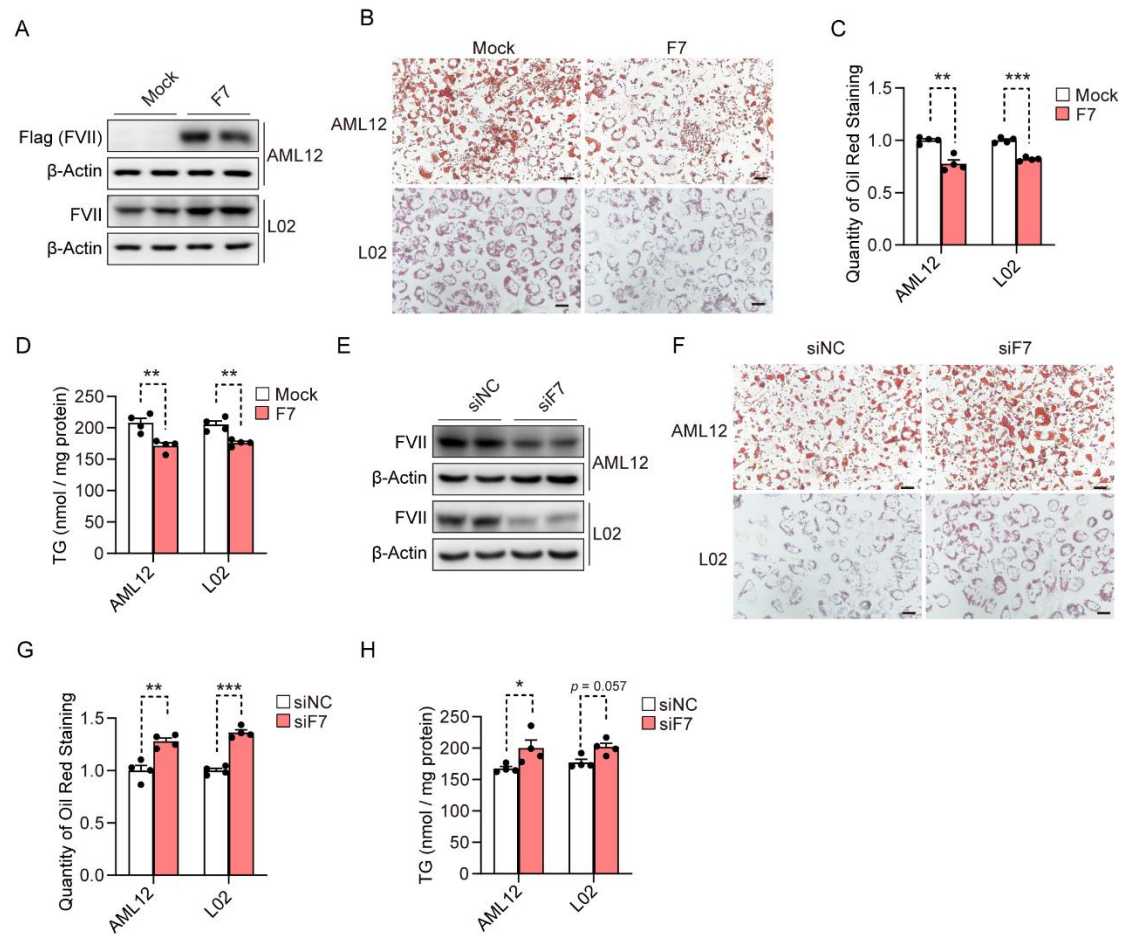

**Figure S2. FVII impairs FFA-induced lipid accumulation in hepatocytes, related to Figure 2**

(A) Immunoblot analysis of FVII protein levels in F7-overexpressed AML12 and L02 cells.  $\beta$ -Actin was used as a loading control.

(B) Representative images of Oil Red O staining of F7-overexpressed AML12 and L02 cells. Scale bar, 100  $\mu$ m.

(C) Quantification of Oil Red O staining from panel (B).

(D) Cellular TG contents in F7-overexpressed AML12 and L02 cells.

(E) Immunoblot analysis of FVII protein levels in F7-silenced AML12 and L02 cells.

$\beta$ -Actin was used as a loading control.

(F) Representative images of Oil Red O staining of in F7-silenced AML12 and L02 cells. Scale bar, 100  $\mu\text{m}$ .

(G) Quantification of Oil Red O staining from panel (F).

(H) Cellular TG contents in F7-silenced AML12 and L02 cells.

Data are presented as mean  $\pm$  S.E.M. Significance was assessed by Student's *t* test (C, D, G, H) or Mann-Whitney *U* test (H). \*  $P < 0.05$ , \*\*  $P < 0.01$ , \*\*\*  $P < 0.001$  versus control.

## Figure S3

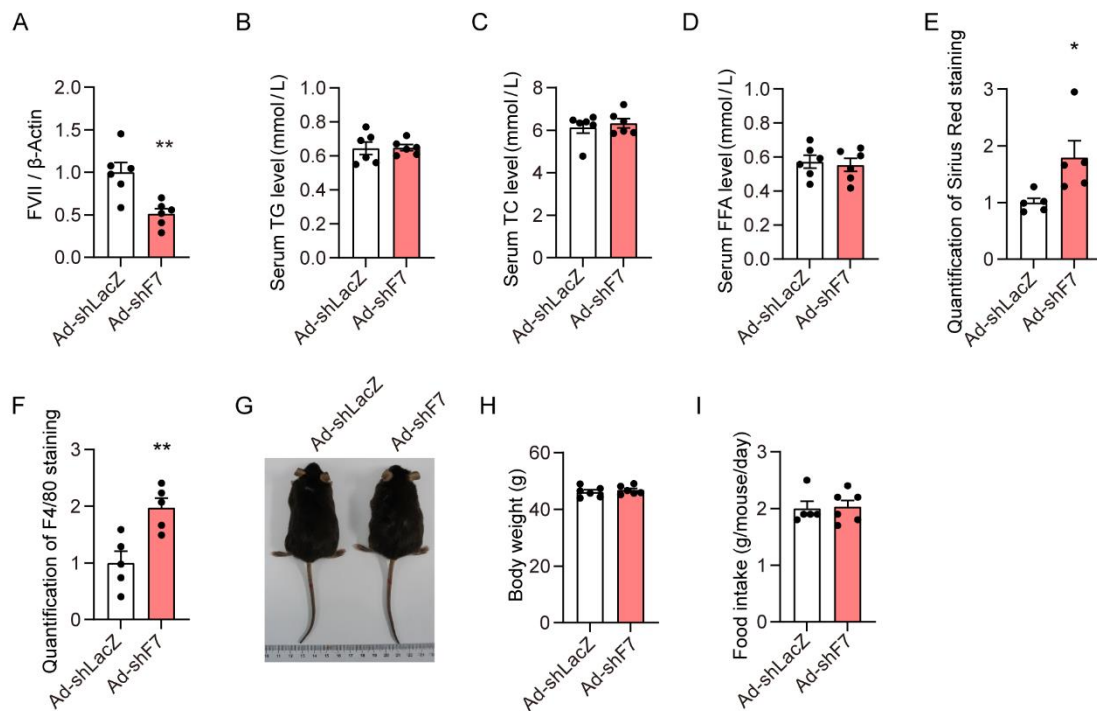

**Figure S3. Evaluation of the metabolic parameters in hepatic F7 knockdown mice, related to Figure 2**

(A) Quantitative analysis of FVII expression from panel (H) in Figure 2.

(B) Serum TG levels of Ad-shLacZ and Ad-shF7 DIO mice ( $n = 6$  / group).

(C) Serum TC levels of Ad-shLacZ and Ad-shF7 DIO mice ( $n = 6$  / group).

(D) Serum FFA levels of Ad-shLacZ and Ad-shF7 DIO mice ( $n = 6$  / group).

(E) Quantitative analysis of Sirius Red staining from panel (O) in Figure 2.

(F) Quantitative analysis of F4/80 staining from panel (O) in Figure 2.

(G) The representative photograph of Ad-shLacZ and Ad-shF7 DIO mice.

(H) Body weight of Ad-shLacZ and Ad-shF7 DIO mice ( $n = 6$  / group).

(I) Food intake of Ad-shLacZ and Ad-shF7 DIO mice ( $n = 6$  / group).

Data are presented as mean  $\pm$  S.E.M. Significance was assessed by Student's *t* test (A-

F, H) or Mann-Whitney  $U$  test (I). \*  $P < 0.05$ , \*\*  $P < 0.01$  versus control.

## Figure S4

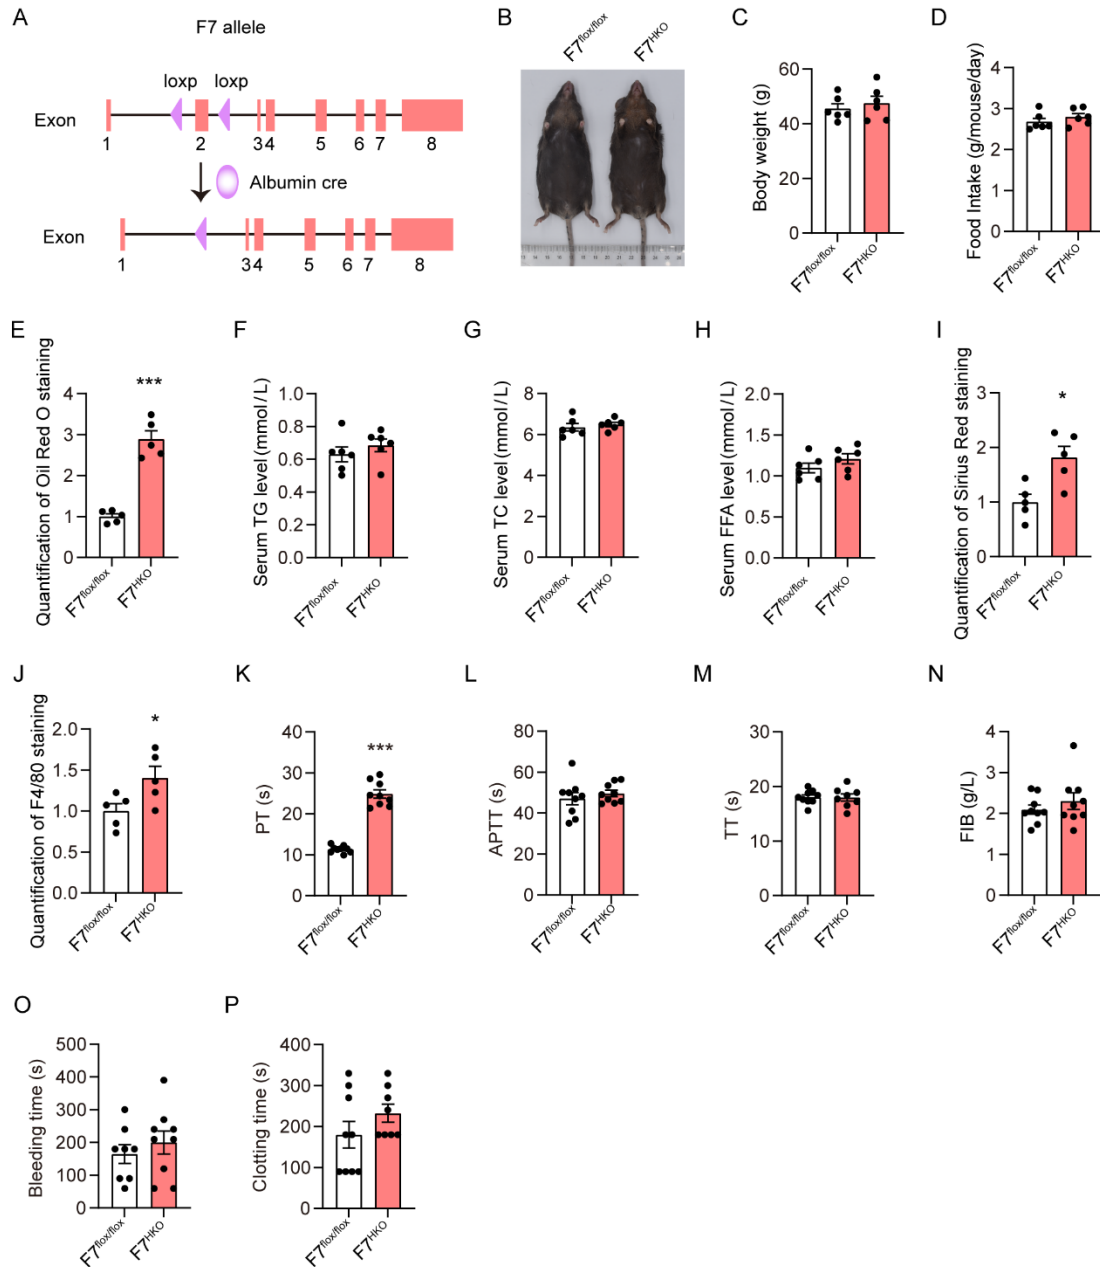

**Figure S4. Evaluation of the metabolic parameters and coagulation homeostasis in hepatic specific F7 knockout mice, related to Figure 3**

(A) Schematic diagram of F7<sup>HKO</sup> mice (F7<sup>flox/flox</sup>, Albumin-cre mice) construction.

(B) The representative photograph of F7<sup>flox/flox</sup> and F7<sup>HKO</sup> mice.

- (C) Body weight of F7<sup>flox/flox</sup> and F7<sup>HKO</sup> mice ( $n = 6$  / group).
- (D) Food intake of F7<sup>flox/flox</sup> and F7<sup>HKO</sup> mice ( $n = 6$  / group).
- (E) Quantitative analysis of Oil Red O staining from panel (F) in Figure 3.
- (F) Serum TG levels of F7<sup>flox/flox</sup> and F7<sup>HKO</sup> mice ( $n = 6$  / group).
- (G) Serum TC levels of F7<sup>flox/flox</sup> and F7<sup>HKO</sup> mice ( $n = 6$  / group).
- (H) Serum FFA levels of F7<sup>flox/flox</sup> and F7<sup>HKO</sup> mice ( $n = 6$  / group).
- (I) Quantitative analysis of Sirius Red staining from panel (J) in Figure 3.
- (J) Quantitative analysis of F4/80 staining from panel (J) in Figure 3.
- (K) The prothrombin time (PT) of F7<sup>flox/flox</sup> and F7<sup>HKO</sup> mice ( $n = 9$  / group).
- (L) The activated partial thromboplastin time (APTT) of F7<sup>flox/flox</sup> and F7<sup>HKO</sup> mice ( $n = 9$  / group).
- (M) The thrombin time (TT) of F7<sup>flox/flox</sup> and F7<sup>HKO</sup> mice ( $n = 9$  / group).
- (N) The plasma fibrinogen (FIB) levels of F7<sup>flox/flox</sup> and F7<sup>HKO</sup> mice ( $n = 9$  / group).
- (O) The tail bleeding time of F7<sup>flox/flox</sup> and F7<sup>HKO</sup> mice ( $n = 9$  / group).
- (P) The blood clotting time of F7<sup>flox/flox</sup> and F7<sup>HKO</sup> mice ( $n = 9$  / group).

Data are presented as mean  $\pm$  S.E.M. Significance was assessed by Student's *t* test (C-O) or Mann-Whitney *U* test (P). \*  $P < 0.05$ , \*\*\*  $P < 0.001$  versus control.

## Figure S5

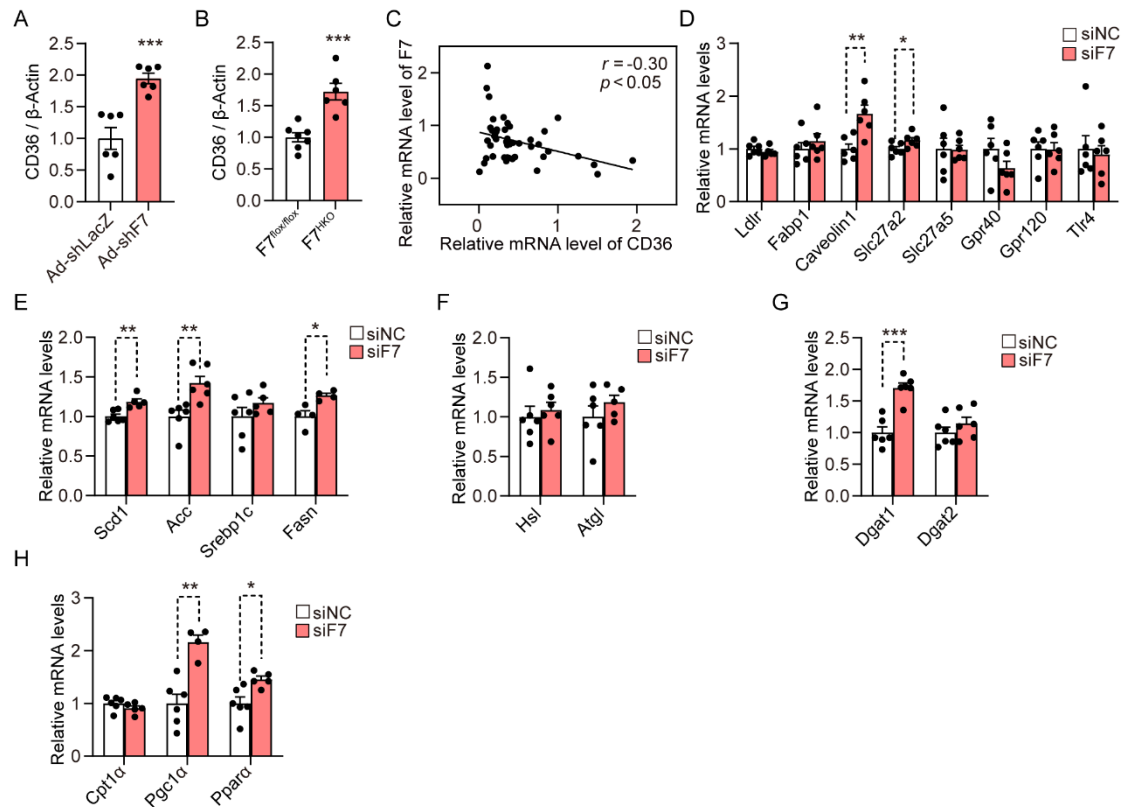

**Figure S5. FVII exerts mild function in other lipid metabolic process, related to Figure 4**

(A, B) Quantitative analysis of CD36 expression from panel (K) and (L) in Figure 4, respectively.

(C) Correlation analysis between hepatic *F7* and *Cd36* mRNA level in individuals with or without NAFLD ( $n = 45$ ).

(D-H) RT-qPCR analysis of genes related to lipid transport (D), *de novo* lipogenesis (E), lipolysis (F), FA esterification (G), and  $\beta$  oxidation (H) in primary hepatocyte treated with FFA for 12 h after transfection with siNC or siF7 for 48 h.

Data are presented as mean  $\pm$  S.E.M. Significance was assessed by Student's *t* test (A,

B, D-H) or Spearman correlation (C). \*  $P < 0.05$ , \*\*  $P < 0.01$ , \*\*\*  $P < 0.001$  versus

control.

## Figure S6

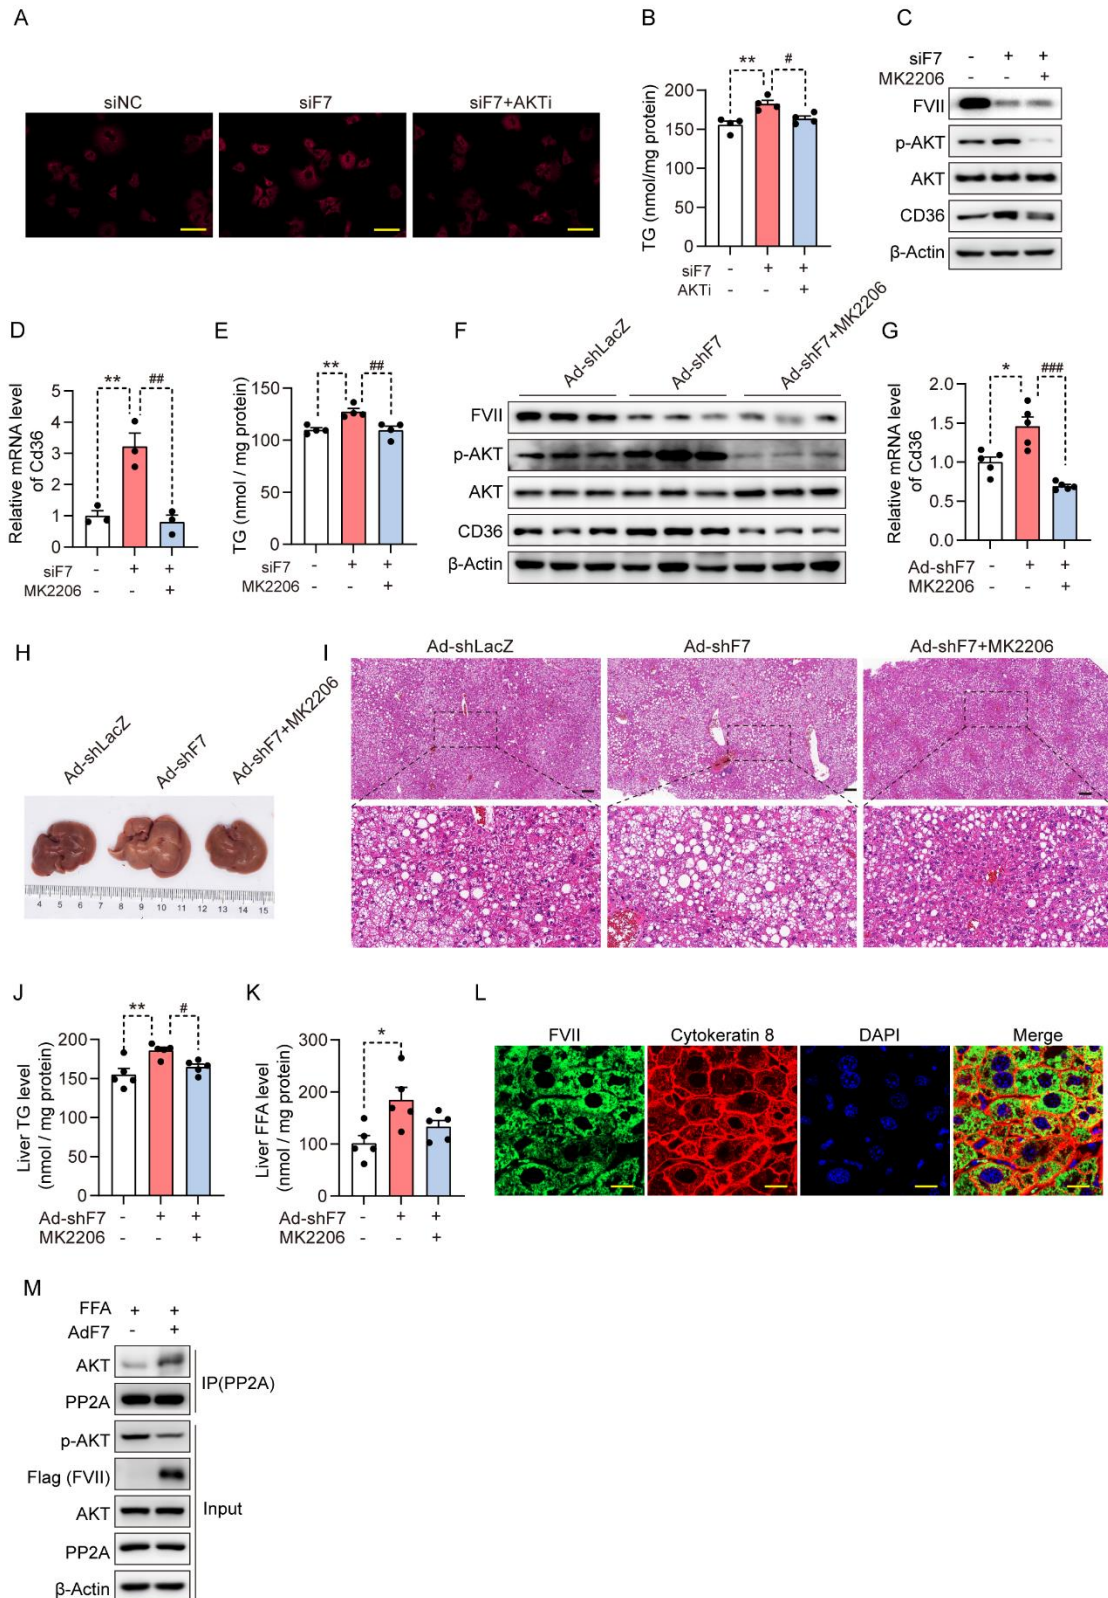

**Figure S6. FVII modulates CD36 expression via activating AKT signaling, related to Figure 6.**

(A) Representative Nile Red staining of primary hepatocytes transfected with siNC or siF7 for 24 h and in the absence or presence of AKTi (10  $\mu$ M) for another 24 h. Scale bar, 100  $\mu$ m.

(B) Cellular TG contents of primary hepatocytes transfected with siNC or siF7 in the absence or presence of AKTi (10  $\mu$ M).

(C) Immunoblot analysis of indicated protein levels in primary hepatocytes transfected with siNC or siF7 for 48 h, in the presence or absence of MK2206 (1  $\mu$ M).  $\beta$ -Actin was used as a loading control.

(D) RT-qPCR analysis of *Cd36* mRNA levels in primary hepatocytes transfected with siNC or siF7 for 48 h, in the presence or absence of MK2206 (1  $\mu$ M).

(E) Cellular TG levels of primary hepatocytes transfected with siNC or siF7 for 48 h, in the presence or absence of MK2206 (1  $\mu$ M).

(F) Immunoblot analysis of indicated protein levels in the livers of Ad-shLacZ, Ad-shF7 and MK2206-treated Ad-shF7 mice.  $\beta$ -Actin was used as a loading control.

(G) RT-qPCR analysis of *Cd36* mRNA levels in the livers of Ad-shLacZ, Ad-shF7 and MK2206-treated Ad-shF7 mice.  $n = 5$  / group.

(H) Representative liver photographs of Ad-shLacZ, Ad-shF7 and MK2206-treated Ad-shF7 mice.

(I) Representative images of H&E staining from liver sections of Ad-shLacZ, Ad-shF7 and MK2206-treated Ad-shF7 mice. Scale bar, 200  $\mu$ m.



(J) Liver TG levels of Ad-shLacZ, Ad-shF7 and MK2206-treated Ad-shF7 mice.  $n = 5$  / group.

(K) Liver FFA levels of Ad-shLacZ, Ad-shF7 and MK2206-treated Ad-shF7 mice.  $n = 5$  / group.

(L) Immunofluorescence staining of FVII (green), cytokeratin 8 (red) and DAPI (blue) in liver section of wildtype mice. Scale bar, 10  $\mu\text{m}$ .

(M) Immunoblot analysis of the indicated protein levels enriched by immunoprecipitation of PP2A in FFA-treated Ad-ctrl and Ad-F7 primary hepatocytes.  $\beta$ -Actin was used as a loading control.

Data are presented as mean  $\pm$  S.E.M. Significance was assessed by one way ANOVA

(B, D, E, G, J, K). \* or #  $P < 0.05$ , \*\* or ##  $P < 0.01$ , ###  $P < 0.001$  versus control.

**Figure S7**

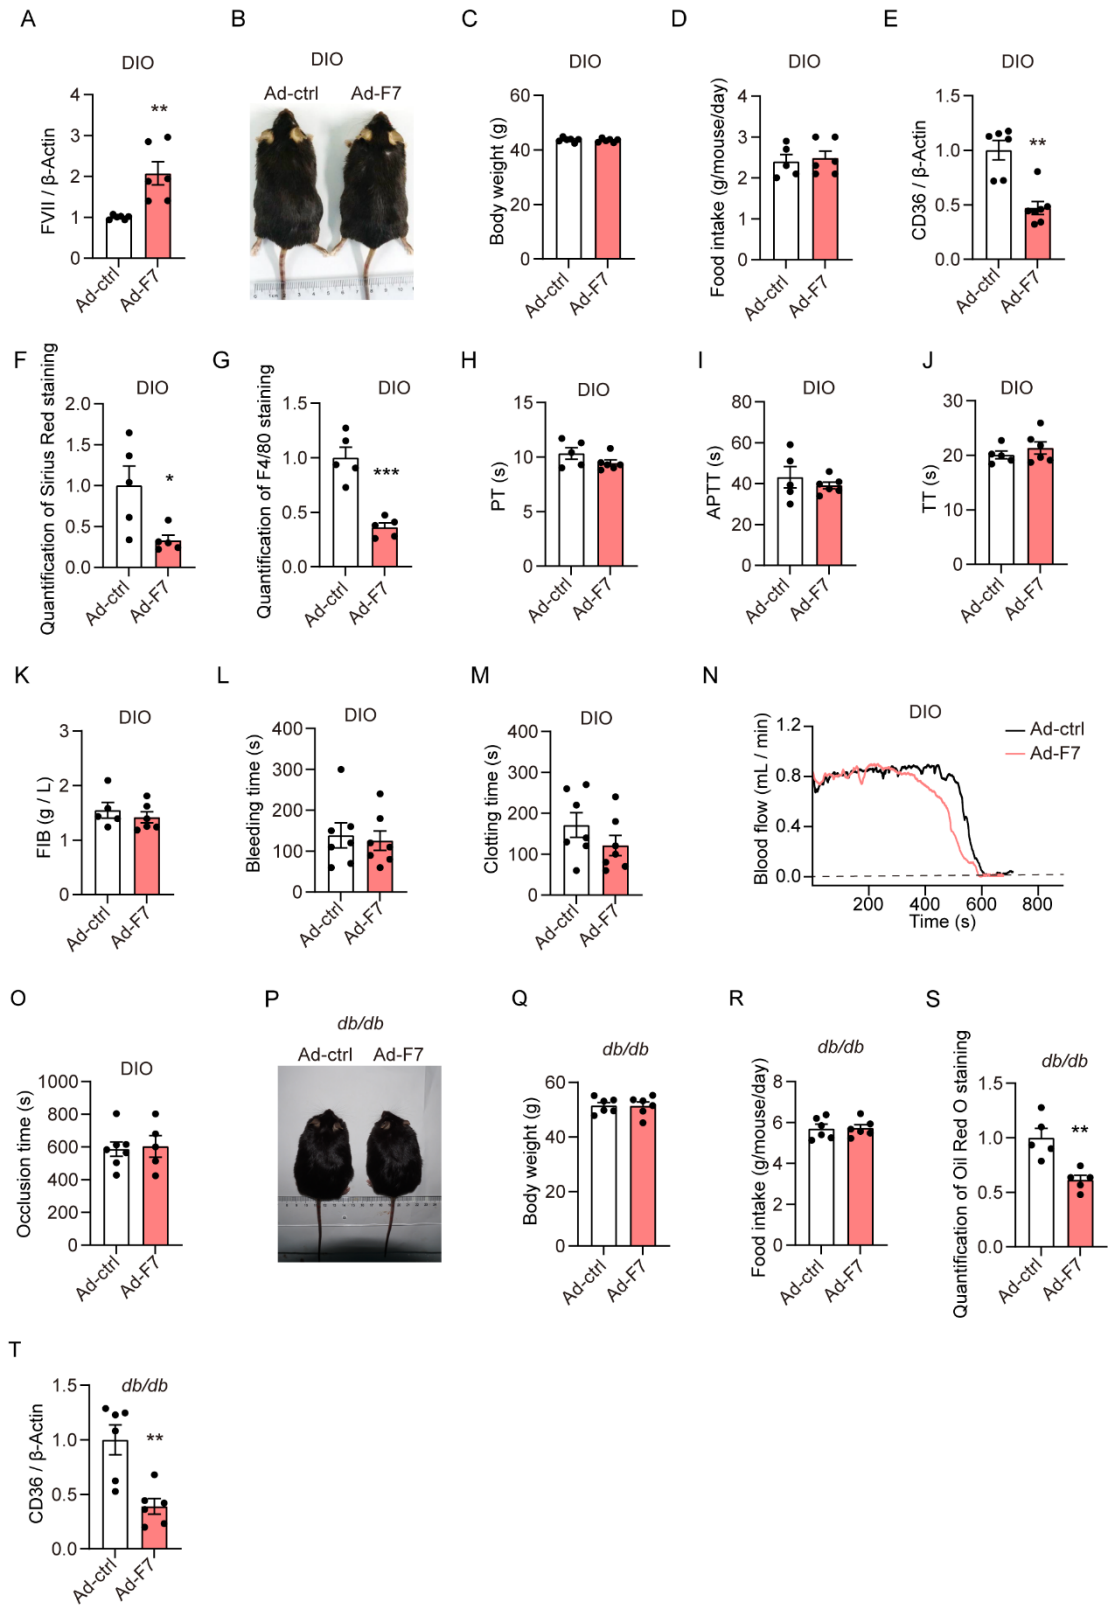

**Figure S7. Overexpression of hepatic FVII does not alter coagulation homeostasis, related to Figure 7.**

- (A) Quantitative analysis of FVII protein abundance from panel (B) in Figure 7.
- (B) The representative photograph of Ad-ctrl and Ad-F7 DIO mice.
- (C) Body weight of Ad-ctrl and Ad-F7 DIO mice ( $n = 6 / \text{group}$ ).
- (D) Food intake of Ad-ctrl and Ad-F7 DIO mice ( $n = 5-6 / \text{group}$ ).
- (E) Quantitative analysis of CD36 protein abundance from panel (I) in Figure 7.
- (F) Quantitative analysis of Sirius Red staining from panel (K) in Figure 7.
- (G) Quantitative analysis of F4/80 staining from panel (K) in Figure 7.
- (H) The prothrombin time (PT) of Ad-ctrl and Ad-F7 DIO mice ( $n = 5-6 / \text{group}$ ).
- (I) The activated partial thromboplastin time (APTT) of Ad-ctrl and Ad-F7 DIO mice ( $n = 5-6 / \text{group}$ ).
- (J) The thrombin time (TT) of Ad-ctrl and Ad-F7 DIO mice ( $n = 5-6 / \text{group}$ ).
- (K) The plasma fibrinogen (FIB) levels of Ad-ctrl and Ad-F7 DIO mice ( $n = 5-6 / \text{group}$ ).
- (L) The tail bleeding time of Ad-ctrl and Ad-F7 DIO mice ( $n = 7 / \text{group}$ ).
- (M) The blood clotting time of Ad-ctrl and Ad-F7 DIO mice ( $n = 7 / \text{group}$ ).
- (N) Blood flow records of FeCl<sub>3</sub>-induced carotid artery thrombosis formation in Ad-ctrl and Ad-F7 DIO mice.
- (O) The occlusion time of FeCl<sub>3</sub>-treated carotid artery in Ad-ctrl and Ad-F7 DIO mice ( $n = 5-7 / \text{group}$ ).
- (P) The representative photograph of Ad-ctrl and Ad-F7 *db/db* mice.
- (Q) Body weight of Ad-ctrl and Ad-F7 *db/db* mice ( $n = 6 / \text{group}$ ).
- (R) Food intake of Ad-ctrl and Ad-F7 *db/db* mice ( $n = 6 / \text{group}$ ).
- (S) Quantitative analysis of Oil Red O staining from panel (R) in Figure 7.

(T) Quantitative analysis of CD36 protein abundance from panel (Y) in Figure 7.

Data are presented as mean  $\pm$  S.E.M. Significance was assessed by Student's *t* test (A, C, D, F-M, O, Q-T) or Mann-Whitney *U* test (E). \*  $P < 0.05$ , \*\*  $P < 0.01$ , \*\*\*  $P < 0.001$  versus control.

**Table S1. Mice characterizations**

| NO. | Body weight (g) | Liver weight (g) | Liver TG level (nmol/mg protein) | Liver TC level (nmol/mg protein) | liver FFA level (nmol/mg protein) |
|-----|-----------------|------------------|----------------------------------|----------------------------------|-----------------------------------|
| 1   | 54.5            | 2.88             | 290.41                           | 18.13                            | 339.51                            |
| 2   | 53.2            | 3.56             | 304.81                           | 18.88                            | 357.76                            |
| 3   | 56.3            | 3.47             | 317.55                           | 20.55                            | 425.02                            |
| 4   | 51.7            | 2.63             | 323.24                           | 20.75                            | 522.95                            |
| 5   | 56.2            | 3.4              | 324.11                           | 19.97                            | 561.16                            |
| 6   | 54              | 3.48             | 343.75                           | 22.02                            | 575.13                            |
| 7   | 47.7            | 2.45             | 308.95                           | 18.68                            | 523.49                            |
| 8   | 58.5            | 2.91             | 295.10                           | 17.90                            | 340.90                            |
| 9   | 52.7            | 3.18             | 322.26                           | 18.38                            | 517.26                            |
| 10  | 49.8            | 2.36             | 271.72                           | 15.64                            | 352.60                            |
| 11  | 45.5            | 1.3              | 233.81                           | 14.43                            | 382.16                            |
| 12  | 38.2            | 1.29             | 227.99                           | 14.07                            | 404.88                            |
| 13  | 47.5            | 1.47             | 240.37                           | 14.75                            | 412.58                            |
| 14  | 55              | 3                | 291.65                           | 18.51                            | 456.25                            |
| 15  | 60.1            | 3.6              | 301.07                           | 19.29                            | 474.90                            |
| 16  | 55              | 3.25             | 326.05                           | 20.12                            | 514.42                            |
| 17  | 48.4            | 1.84             | 271.44                           | 16.76                            | 406.83                            |
| 18  | 46.7            | 2.15             | 256.55                           | 15.76                            | 404.03                            |
| 19  | 39.4            | 1.04             | 269.06                           | 17.42                            | 465.29                            |
| 20  | 51.7            | 2.42             | 268.73                           | 15.87                            | 404.73                            |
| 21  | 49.6            | 2.98             | 300.07                           | 17.11                            | 364.24                            |
| 22  | 43.8            | 1.29             | 291.48                           | 16.56                            | 435.16                            |

**Table S2: siRNA sequences and primer sequences list**

| <b>siRNA sequences</b> |                         |
|------------------------|-------------------------|
| <b>Genes (mouse)</b>   | <b>siRNA oligo</b>      |
| F7                     | GCTTCTGCCTCCTAGACTT     |
| CD36                   | CACAUACAGAGUUCGUUUAU    |
| <b>Genes (human)</b>   | <b>siRNA oligo</b>      |
| F7                     | GCCTCACAGAGTCTTCGTA     |
| <b>qRT-PCR primers</b> |                         |
| <b>Genes (mouse)</b>   | <b>Primer sequence</b>  |
| 18S                    | CGCCGCTAGAGGTGAAATTCT   |
|                        | CATTCTTGGCAAATGCTTTCG   |
| F7                     | AAAGGCGTGCCAACTCACTC    |
|                        | CCTACGTTCTGACATGGATTCG  |
| CD36                   | ATGGGCTGTGATCGGAACTG    |
|                        | GTCTTCCCAATAAGCATGTCTCC |
| Hnf4 $\alpha$          | AAGGTGCCAACCTCAATTCATC  |
|                        | CACATTGTCGGCTAAACCTGC   |
| F4/80                  | CCATCCACTTCCAAGATGGGTTA |
|                        | TGCCATCAACTCATGATACCCT  |
| IL1b                   | TGCCACCTTTTGACAGTGATG   |
|                        | TGATGTGCTGCTGCGAGATT    |
| IL6                    | CTGCAAGAGACTTCCATCCAG   |
|                        | AGTGGTATAGACAGGTCTGTTGG |
| Fibronectin            | GCTCAGCAAATCGTGCAGC     |
|                        | CTAGGTAGGTCCGTTCCCACT   |
| Tgfb                   | CTTCAATACGTCAGACATTCGGG |
|                        | GTAACGCCAGGAATTGTTGCTA  |
| Irel $\alpha$          | ACACCGACCACCGTATCTCA    |
|                        | CTCAGGATAATGGTAGCCATGTC |
| Chop                   | CTGGAAGCCTGGTATGAGGAT   |
|                        | CAGGGTCAAGAGTAGTGAAGGT  |
| Xbp1s                  | CTGAGTCCGAATCAGGTGCAG   |
|                        | CCATGGGAAGATGTTCTGG     |

|               |                          |
|---------------|--------------------------|
| Perk          | AGTCCCTGCTCGAATCTTCCT    |
|               | TCCAAGGCAGAACAGATATAACC  |
| Atf6          | GACTCACCCATCCGAGTTGTG    |
|               | CTCCCAGTCTTCATCTGGTCC    |
| Ldlr          | TGACTCAGACGAACAAGGCTG    |
|               | ATCTAGGCAATCTCGGTCTCC    |
| Pgc1 $\alpha$ | CCCTGCCATTGTAA GACC      |
|               | TGCTGCTGTTCTGTTTTC       |
| PPAR $\alpha$ | GCGTACGGCAATGGCTTTAT     |
|               | GAACGGCTTCCTCAGGTTCTT    |
| Srebp1c       | GGAGCCATGGATTGCACATT     |
|               | GGCCCGGGAAGTCACTGT       |
| Acc           | TGACAGACTGATCGCAGAGAAAG  |
|               | TGGAGAGCCCCACACACA       |
| Fasn          | GCTGCGGAAACTTCAGGAAAT    |
|               | AGAGACGTGTCACTCCTGGACTT  |
| Scd1          | TCCCTCCGGAAATGAACGAGAGAA |
|               | AGTGCAGCAGGACCATGAGAATGA |
| Cpt1 $\alpha$ | TTCACTGTGACCCCAGACGGG    |
|               | AATGGACCAGCCCCATGGAGA    |
| Hsl           | TCAAGCCAAGGTGTCCTCCACATG |
|               | GGGTGCAAGAGGTCTTTTAGTGCC |
| Atgl          | GGATGGCGGCATTTTCAGACA    |
|               | CAAAGGGTTGGGTTGGTTCAG    |
| Slc27a2       | TCCTCCAAGATGTGCGGTACTION |
|               | TAGGTGAGCGTCTCGTCTCG     |
| Slc27a5       | CTACGCTGGCTGCATATAGATG   |
|               | CCACAAAGGTCTCTGGAGGAT    |
| Tnf $\alpha$  | CCCTCACACTCAGATCATCTTCT  |
|               | GCTACGACGTGGGCTACAG      |
| Ccl2          | TTAAAAACCTGGATCGGAACCAA  |
|               | GCATTAGCTTCAGATTTACGGGT  |
| CD68          | TGTCTGATCTTGCTAGGACCG    |
|               | GAGAGTAACGGCCTTTTTGTGA   |

|                                                  |                                                               |
|--------------------------------------------------|---------------------------------------------------------------|
| Col1a1                                           | GCTCCTCTTAGGGGCCACT                                           |
|                                                  | CCACGTCTCACCATTGGGG                                           |
| Col3a1                                           | CTGTAACATGGAACTGGGGAAA                                        |
|                                                  | CCATAGCTGAACTGAAAACCACC                                       |
| Ctgf                                             | GGGCCTTCTGCGATTTC                                             |
|                                                  | ATCCAGGCAAGTGCATTGGTA                                         |
| Timp1                                            | GCAACTCGGACCTGGTCATAA                                         |
|                                                  | CGGCCCGTGATGAGAACT                                            |
| Dgat1                                            | TCCGTCCAGGGTGGTAGTG                                           |
|                                                  | TGAACAAAGAATCTTGCAGACGA                                       |
| Dgat2                                            | GCGCTACTTCCGAGACTACTT                                         |
|                                                  | GGGCCTTATGCCAGGAACT                                           |
| <b>qRT-PCR primers</b>                           |                                                               |
| <b>Genes (human)</b>                             | <b>Primer sequence</b>                                        |
| 18S                                              | TTCGAACGTCTGCCCTATCAA                                         |
|                                                  | ATGGTAGGCACGGCGACTA                                           |
| F7                                               | CGGACGTTCTCTGAGAGGAC                                          |
|                                                  | GGCACGTTGAGGACCATGAG                                          |
| HNF4 $\alpha$                                    | CGAAGGTCAAGCTATGAGGACA                                        |
|                                                  | ATCTGCGATGCTGGCAATCT                                          |
| CD36                                             | GGCTGTGACCGGAACTGTG                                           |
|                                                  | AGGTCTCCAACCTGGCATTAGAA                                       |
| <b>Primer sequences for plasmid construction</b> |                                                               |
| pLVX-F7(mouse)-Flag                              | CCGCTCGAGATGGTTCCACAGGCGCATGGGCT                              |
|                                                  | CCGGAATTCCTACTTGTCGTCGTCGTCCTTGTAGTCCA<br>GTAGTGGGAGTCGGAAAAC |
| pLVX-F7(human)-Flag                              | CCGCTCGAGATGGTCTCCCAGGCCCTCAGGCTC                             |
|                                                  | CCGGAATTCCTACTTGTCGTCGTCGTCCTTGTAGTCGG<br>GAAATGGGGCTCGCAGGAG |
| Adv-F7-Flag                                      | CACCATGGTTCCACAGGCGCATG                                       |
|                                                  | CTACTTGTCGTCGTCGTCCTT                                         |
| Adv-F7 mut-Flag                                  | CACCATGGTTTTTCATAACCCAGGAGG                                   |
|                                                  | CTACTTGTCGTCGTCGTCCTT                                         |

Adv-F7-shRNA

CACCGCTTCGATAATATCCGCTACTCGAAAGTAGCGGA  
TATTATCGAA GC
